# Supplementary material for: Computational study of the mechanism of a polyurethane esterase A (PueA) from Pseudomonas chlororaphis
Source: Royal Society of Chemistry journal article supplement (doi:10.1039/d4fd00022f), 2024-01-01
Supplement: d4fd00022f1.pdf [file d4fd00022f1.pdf]

## Supplementary Information

# Computational study of the Mechanism of a polyurethane esterase A (PueA) from *Pseudomonas chlororaphis*

*Katarzyna Świderek,\* Sergio Martí, Kemel Arafet and Vicent Moliner\**

BioComp Group. Institute of Advanced Materials (INAM). Universitat Jaume I. 12071  
Castellón. Spain.

**Table S1.** Atom types, charges (in a.u.) and parameters obtained after parametrization of Impranil obtained using structure molecule structure optimized at AM1 level of theory and GAFF force field.

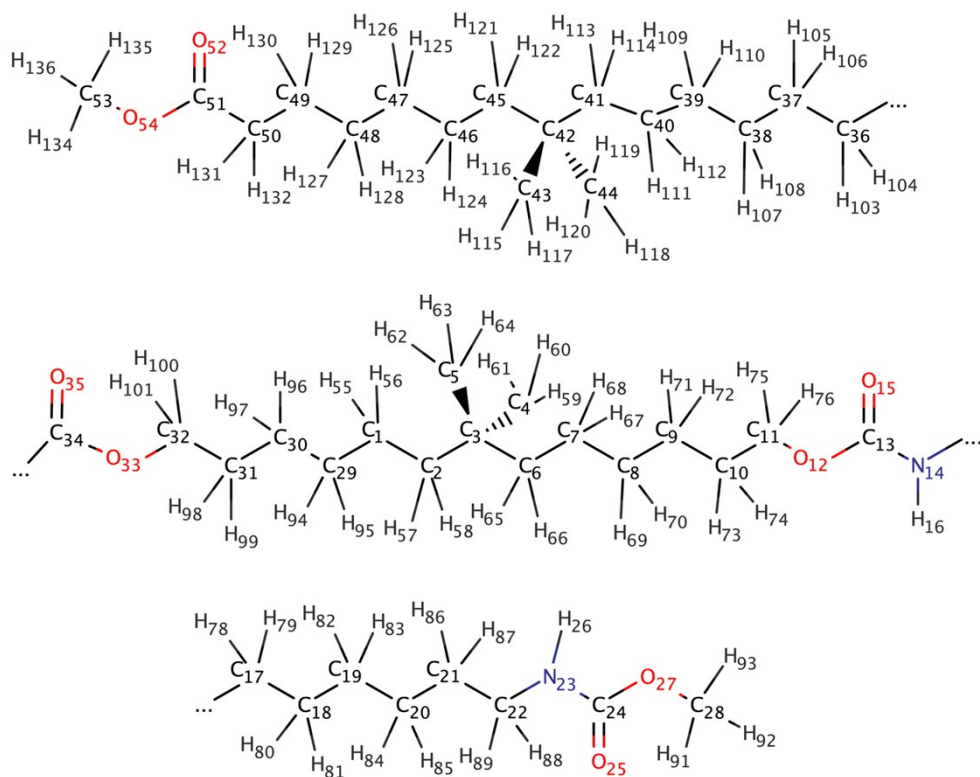

| Label | Type | Charge  | Label | Type | Charge  | Label | Type | Charge  |
|-------|------|---------|-------|------|---------|-------|------|---------|
| C28   | c3   | 0.1377  | C7    | c3   | -0.0894 | H108  | hc   | 0.0432  |
| H91   | h1   | 0.0527  | H67   | hc   | 0.0537  | C39   | c3   | -0.0824 |
| H92   | h1   | 0.0527  | H68   | hc   | 0.0537  | H109  | hc   | 0.0417  |
| H93   | h1   | 0.0527  | C6    | c3   | -0.0664 | H110  | hc   | 0.0417  |
| O27   | os   | -0.4479 | H65   | hc   | 0.0362  | C40   | c3   | -0.0794 |
| C24   | c    | 0.7181  | H66   | hc   | 0.0362  | H111  | hc   | 0.0412  |
| O25   | o    | -0.578  | C3    | c3   | -0.048  | H112  | hc   | 0.0412  |
| N23   | n    | -0.5119 | C4    | c3   | -0.0931 | C41   | c3   | -0.0704 |
| H26   | hn   | 0.3105  | H59   | hc   | 0.0352  | H113  | hc   | 0.0412  |
| C22   | c3   | 0.078   | H60   | hc   | 0.0352  | H114  | hc   | 0.0412  |
| H88   | h1   | 0.0702  | H61   | hc   | 0.0352  | C42   | c3   | -0.05   |
| H89   | h1   | 0.0702  | C5    | c3   | -0.0931 | C43   | c3   | -0.0866 |
| C21   | c3   | -0.1184 | H62   | hc   | 0.0352  | H115  | hc   | 0.0342  |
| H86   | hc   | 0.0557  | H63   | hc   | 0.0352  | H116  | hc   | 0.0342  |
| H87   | hc   | 0.0557  | H64   | hc   | 0.0352  | H117  | hc   | 0.0342  |
| C20   | c3   | -0.0814 | C2    | c3   | -0.0694 | C44   | c3   | -0.0866 |
| H84   | hc   | 0.0427  | H57   | hc   | 0.0422  | H118  | hc   | 0.0342  |
| H85   | hc   | 0.0427  | H58   | hc   | 0.0422  | H119  | hc   | 0.0342  |
| C19   | c3   | -0.0844 | C1    | c3   | -0.0774 | H120  | hc   | 0.0342  |
| H82   | hc   | 0.0402  | H55   | hc   | 0.0397  | C45   | c3   | -0.0714 |
| H83   | hc   | 0.0402  | H56   | hc   | 0.0397  | H121  | hc   | 0.0392  |

|     |    |         |      |    |         |      |    |         |
|-----|----|---------|------|----|---------|------|----|---------|
| C18 | c3 | -0.1174 | C29  | c3 | -0.0824 | H122 | hc | 0.0392  |
| H80 | hc | 0.0557  | H94  | hc | 0.0472  | C46  | c3 | -0.0814 |
| H81 | hc | 0.0557  | H95  | hc | 0.0472  | H123 | hc | 0.0432  |
| C17 | c3 | 0.078   | C30  | c3 | -0.0754 | H124 | hc | 0.0432  |
| H78 | h1 | 0.0702  | H96  | hc | 0.0367  | C47  | c3 | -0.0784 |
| H79 | h1 | 0.0702  | H97  | hc | 0.0367  | H125 | hc | 0.0412  |
| N14 | n  | -0.5099 | C31  | c3 | -0.0854 | H126 | hc | 0.0412  |
| H16 | hn | 0.3085  | H98  | hc | 0.0537  | C48  | c3 | -0.0774 |
| C13 | c  | 0.7201  | H99  | hc | 0.0537  | H127 | hc | 0.0402  |
| O15 | o  | -0.582  | C32  | c3 | 0.1384  | H128 | hc | 0.0402  |
| O12 | os | -0.4499 | H100 | h1 | 0.0547  | C49  | c3 | -0.0824 |
| C11 | c3 | 0.1514  | H101 | h1 | 0.0547  | H129 | hc | 0.0592  |
| H75 | h1 | 0.0547  | O33  | os | -0.4439 | H130 | hc | 0.0592  |
| H76 | h1 | 0.0547  | C34  | c  | 0.6291  | C50  | c3 | -0.1274 |
| C10 | c3 | -0.0844 | O35  | o  | -0.543  | H131 | hc | 0.0797  |
| H73 | hc | 0.0532  | C36  | c3 | -0.1264 | H132 | hc | 0.0797  |
| H74 | hc | 0.0532  | H103 | hc | 0.0777  | C51  | c  | 0.6301  |
| C9  | c3 | -0.0804 | H104 | hc | 0.0777  | O52  | o  | -0.546  |
| H71 | hc | 0.0462  | C37  | c3 | -0.0764 | O54  | os | -0.4429 |
| H72 | hc | 0.0462  | H105 | hc | 0.0552  | C53  | c3 | 0.1227  |
| C8  | c3 | -0.0764 | H106 | hc | 0.0552  | H134 | h1 | 0.0517  |
| H69 | hc | 0.0347  | C38  | c3 | -0.0794 | H135 | h1 | 0.0517  |
| H70 | hc | 0.0347  | H107 | hc | 0.0432  | H136 | h1 | 0.0517  |

| <b>MASS</b>  |       |       |  | <b>DIHE</b> |   |      |     |    |
|--------------|-------|-------|--|-------------|---|------|-----|----|
| c3           | 12.01 | 0.878 |  | o-c-os-c3   | 1 | 2.7  | 180 | -2 |
| h1           | 1.008 | 0.135 |  | o-c-os-c3   | 1 | 1.4  | 180 | 1  |
| os           | 16    | 0.465 |  | n-c-os-c3   | 2 | 5.4  | 180 | 2  |
| c            | 12.01 | 0.616 |  | h1-c3-os-c  | 3 | 1.15 | 0   | 3  |
| o            | 16    | 0.434 |  | os-c-n-hn   | 4 | 10   | 180 | 2  |
| n            | 14.01 | 0.53  |  | os-c-n-c3   | 4 | 10   | 180 | 2  |
| hn           | 1.008 | 0.161 |  | h1-c3-n-c   | 6 | 0    | 0   | 2  |
| hc           | 1.008 | 0.135 |  | c3-c3-n-c   | 1 | 0.5  | 180 | -4 |
|              |       |       |  | c3-c3-n-c   | 1 | 0.15 | 180 | -3 |
| <b>BOND</b>  |       |       |  | c3-c3-n-c   | 1 | 0    | 0   | -2 |
| c3-h1        | 330.6 | 1.097 |  | c3-c3-n-c   | 1 | 0.53 | 0   | 1  |
| c3-os        | 308.6 | 1.432 |  | o-c-n-hn    | 1 | 2.5  | 180 | -2 |
| c-os         | 390.8 | 1.358 |  | o-c-n-hn    | 1 | 2    | 0   | 1  |
| c-o          | 637.7 | 1.218 |  | o-c-n-c3    | 4 | 10   | 180 | 2  |
| c-n          | 427.6 | 1.379 |  | hc-c3-c3-n  | 9 | 1.4  | 0   | 3  |
| hn-n         | 403.2 | 1.013 |  | c3-c3-c3-n  | 9 | 1.4  | 0   | 3  |
| c3-n         | 328.7 | 1.462 |  | h1-c3-n-hn  | 6 | 0    | 0   | 2  |
| c3-c3        | 300.9 | 1.538 |  | c3-c3-n-hn  | 6 | 0    | 0   | 2  |
| c3-hc        | 330.6 | 1.097 |  | c3-c3-c3-hc | 1 | 0.16 | 0   | 3  |
| c-c3         | 313   | 1.524 |  | c3-c3-c3-c3 | 1 | 0.18 | 0   | -3 |
|              |       |       |  | c3-c3-c3-c3 | 1 | 0.25 | 180 | -2 |
| <b>ANGLE</b> |       |       |  | c3-c3-c3-c3 | 1 | 0.2  | 180 | 1  |

|                 |        |        |   |             |   |       |     |    |
|-----------------|--------|--------|---|-------------|---|-------|-----|----|
| c-os-c3         | 63.3   | 115.98 |   | h1-c3-c3-hc | 9 | 1.4   | 0   | 3  |
| h1-c3-h1        | 39.2   | 108.46 |   | c3-c3-c3-h1 | 9 | 1.4   | 0   | 3  |
| h1-c3-os        | 50.8   | 109.78 |   | hc-c3-c3-hc | 1 | 0.15  | 0   | 3  |
| o-c-os          | 75.3   | 123.25 |   | c3-c3-os-c  | 1 | 0.383 | 0   | -3 |
| n-c-os          | 75.3   | 109.22 |   | c3-c3-os-c  | 1 | 0.8   | 180 | 1  |
| c-n-hn          | 48.3   | 117.55 |   | hc-c3-c3-os | 1 | 0     | 0   | -3 |
| c-n-c3          | 63.4   | 120.69 |   | hc-c3-c3-os | 1 | 0.25  | 0   | 1  |
| n-c-o           | 74.2   | 123.05 |   | c3-c3-c3-os | 9 | 1.4   | 0   | 3  |
| h1-c3-n         | 49.8   | 108.88 |   | c3-c-os-c3  | 1 | 2.7   | 180 | -2 |
| c3-c3-n         | 65.9   | 111.61 |   | c3-c-os-c3  | 1 | 0     | 0   | -1 |
| c3-n-hn         | 45.8   | 117.68 |   | c3-c-os-c3  | 1 | 1.15  | 0   | 3  |
| c3-c3-hc        | 46.3   | 109.8  |   | os-c-c3-hc  | 6 | 0     | 180 | 2  |
| c3-c3-c3        | 62.9   | 111.51 |   | os-c-c3-c3  | 6 | 0     | 180 | 2  |
| c3-c3-h1        | 46.4   | 109.56 |   | c-c3-c3-hc  | 9 | 1.4   | 0   | 3  |
| hc-c3-hc        | 39.4   | 107.58 |   | c-c3-c3-c3  | 9 | 1.4   | 0   | 3  |
| c3-c3-os        | 68     | 107.97 |   | o-c-c3-hc   | 1 | 0.8   | 0   | -1 |
| c3-c-os         | 68.9   | 110.72 |   | o-c-c3-hc   | 1 | 0     | 0   | -2 |
| c-c3-hc         | 46.9   | 108.77 |   | o-c-c3-hc   | 1 | 0.08  | 180 | 3  |
| c-c3-c3         | 63.3   | 111.04 |   | o-c-c3-c3   | 6 | 0     | 180 | 2  |
| c3-c-o          | 67.4   | 123.2  |   |             |   |       |     |    |
|                 |        |        |   |             |   |       |     |    |
| <b>IMPROPER</b> |        |        |   |             |   |       |     |    |
| n-o-c-os        | 1.1    | 180    | 2 |             |   |       |     |    |
| c-c3-n-hn       | 1.1    | 180    | 2 |             |   |       |     |    |
| c3-o-c-os       | 1.1    | 180    | 2 |             |   |       |     |    |
|                 |        |        |   |             |   |       |     |    |
| <b>NONBON</b>   |        |        |   |             |   |       |     |    |
| c3              | 1.908  | 0.1094 |   |             |   |       |     |    |
| h1              | 1.387  | 0.0157 |   |             |   |       |     |    |
| os              | 1.6837 | 0.17   |   |             |   |       |     |    |
| c               | 1.908  | 0.086  |   |             |   |       |     |    |
| o               | 1.6612 | 0.21   |   |             |   |       |     |    |
| n               | 1.824  | 0.17   |   |             |   |       |     |    |
| hn              | 0.6    | 0.0157 |   |             |   |       |     |    |
| hc              | 1.487  | 0.0157 |   |             |   |       |     |    |

**Table S2.** List of the pKa of the titratable residues of PueA (aa) as derived from PROPKA3 semiempirical program. Protonation states were assigned at pH 7 according to the obtained

pKa values, except those marked with an asterisk: D\* = deprotonated aspartate, H\* = neutral histidine.

| <b>aa</b> | <b>propKa</b> | <b>aa</b> | <b>propKa</b> | <b>aa</b> | <b>propKa</b> |
|-----------|---------------|-----------|---------------|-----------|---------------|
| D5        | 4.72          | D563      | 4.58          | Y252      | 13.07         |
| D13       | 3.14          | D576      | 4             | Y292      | 13.71         |
| D20       | 4.32          | D578      | 2.78          | Y318      | 17.08         |
| D33       | 4.74          | D589      | 3.26          | Y331      | 13.04         |
| D75       | 3.21          | D597      | 3.47          | Y388      | 16            |
| D82       | 2.86          | E38       | 3.56          | Y404      | 10.42         |
| D100      | 2.57          | E77       | 3.8           | Y425      | 11.87         |
| D104      | 3.41          | E112      | 4.97          | Y436      | 13.46         |
| D128      | 1.94          | E122      | 4.35          | Y487      | 11.72         |
| D153      | 4.33          | E134      | 4.93          | Y559      | 12.22         |
| D157*     | 7.05          | E148      | 2.78          | Y579      | 10.13         |
| D161      | 6.26          | E178      | 3.65          | K7        | 8.83          |
| D170      | 3.73          | E222      | 4.31          | K15       | 9.74          |
| D186      | 3.75          | E253      | 6.5           | K78       | 11.52         |
| D200      | 2.19          | E327      | 4.11          | K102      | 10.11         |
| D218      | 4.57          | E363      | 4.91          | K113      | 11.39         |
| D230      | 3.7           | E390      | 5.35          | K126      | 10.93         |
| D245      | 3.46          | E457      | 3.19          | K169      | 10.57         |
| D255      | 3.43          | E537      | 3.86          | K173      | 10.91         |
| D262      | 3.54          | E607      | 3.69          | K182      | 12.66         |
| D275      | 4.37          | H30       | 6.57          | K199      | 11.45         |
| D279      | 3.64          | H42       | 7.31          | K229      | 10.68         |
| D290      | 3.9           | H85       | 6.09          | K246      | 9.85          |
| D320      | 3.34          | H132*     | 7.43          | K329      | 10.5          |
| D332      | 3.96          | H206      | 1.35          | K336      | 10.17         |
| D337      | 2.99          | H274      | 5.16          | K366      | 10.38         |
| D347      | 2.54          | H277*     | 7.13          | K423      | 10.53         |
| D357      | 3.02          | H291      | 4.48          | K456      | 11.46         |
| D375      | 2.7           | H313      | 6.97          | K466      | 10.22         |
| D378      | 5.26          | H365*     | 9.89          | K479      | 10.39         |
| D387      | 6.16          | H471      | 5.42          | K501      | 10.4          |
| D396      | 7.46          | H503*     | 7.25          | K564      | 10.98         |
| D400*     | 8.23          | H517      | 6.81          | R106      | 15.47         |
| D417      | 3.37          | H550*     | 7.29          | R141      | 10.44         |
| D430      | 3.73          | H582      | 5.71          | R147      | 11.36         |
| D439      | 3.87          | H608      | 6.53          | R223      | 12.48         |
| D449      | 4.21          | Y6        | 12.94         | R259      | 12.02         |
| D467      | 4.12          | Y27       | 13.39         | R324      | 12.53         |
| D468      | 2.88          | Y29       | 13.62         | R350      | 13.19         |
| D475      | 3.9           | Y40       | 14.87         | R360      | 11.99         |
| D494      | 2.81          | Y99       | 12.06         | R392      | 14.49         |
| D497      | 3.21          | Y116      | 10.78         | R399      | 12.63         |
| D507      | 2.52          | Y127      | 10.92         | R438      | 11.66         |
| D513      | 4.03          | Y171      | 13.12         | R448      | 12.46         |
| D516      | 5.49          | Y175      | 14.99         | R492      | 12.29         |
| D525      | 4.69          | Y228      | 14.29         | R555      | 12.36         |
| D534      | 6.36          | Y233      | 13.47         | R580      | 13.59         |
| D554      | 8.57          | Y236      | 14.54         |           |               |

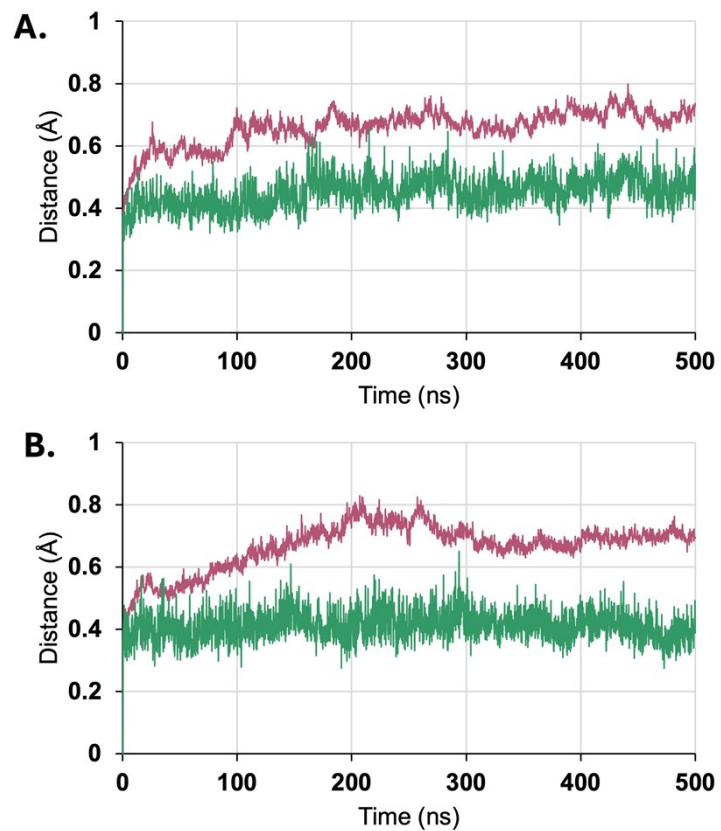

**Figure S1.** Time depending evolution of the RMSD along the 500 ns of unconstrained MD simulations of the reactant complex **RC1** (A) and **RC2** (B), computed with the position of Ca, C, O and N atoms of the protein backbone (pink line) and for heavy atoms of impranil substrate (green line).

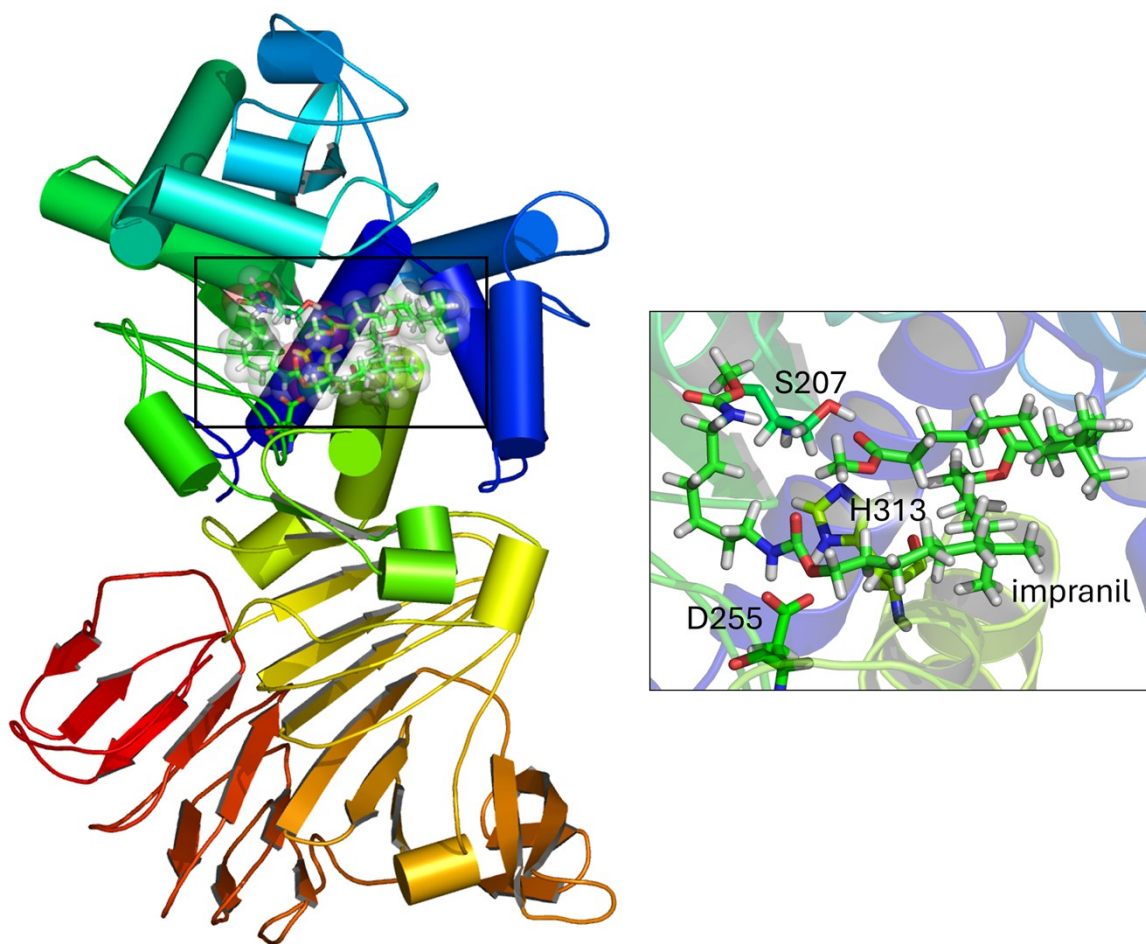

**Figure S2.** Structure of impranil when docked in the PueA enzyme, and detail of the active site, as the result of AutoDock vina.

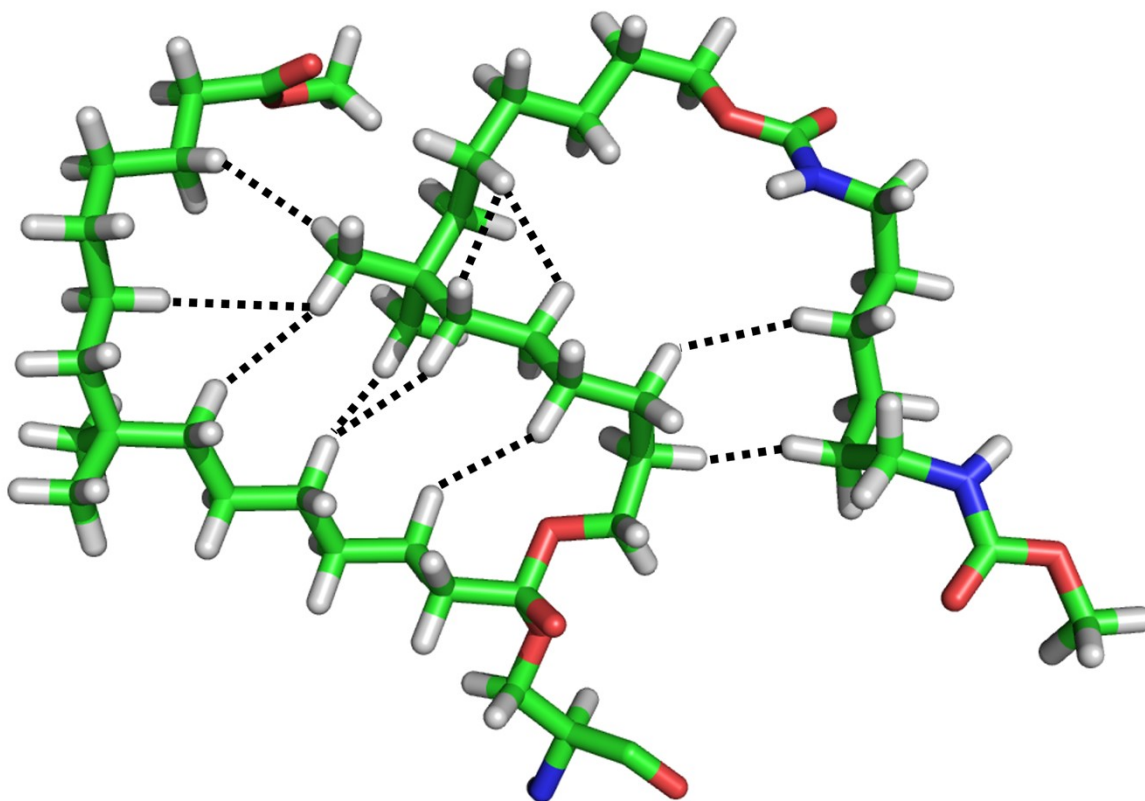

**Figure S3.** Detail of the conformation of the imbranil when docked in the PueA enzyme. as the result of AutoDock Vina. Significantly short intramolecular interactions ( $\text{CH}\cdots\text{HC} < 3 \text{ \AA}$ ) are shown as dashed lines.



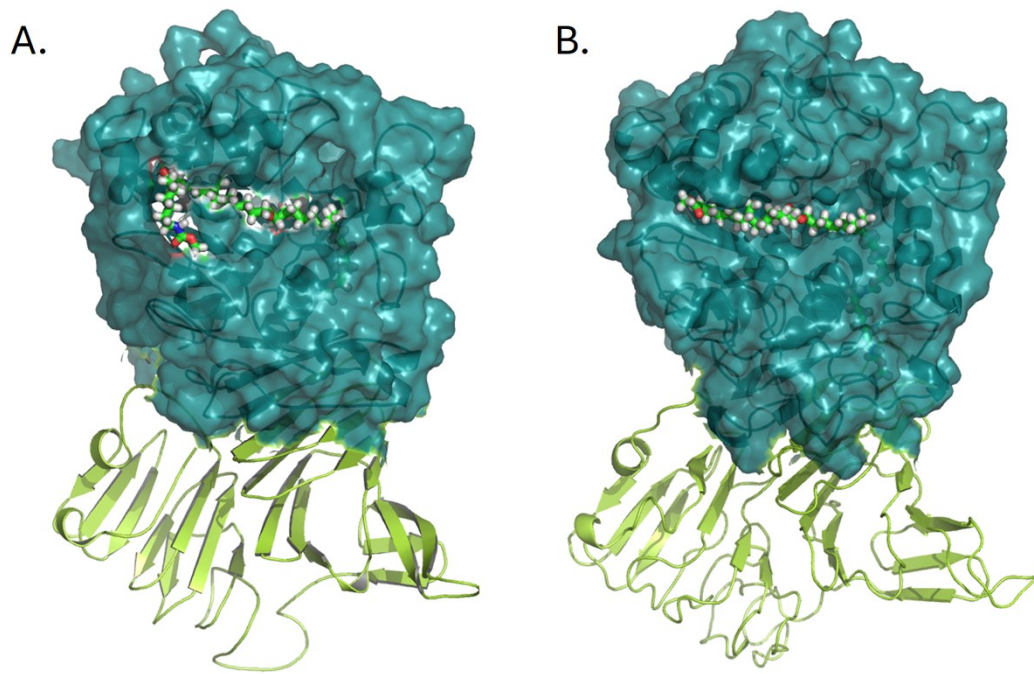

**Figure S4.** Representation of PueA with the extended conformation of impranil docked in the active site (in liquorice) with carbamate end-group exposed to the solvent. **RC1** (A) or inside the protein. **RC2** (B). Structures derived from 500 ns of unbiased MD simulation.

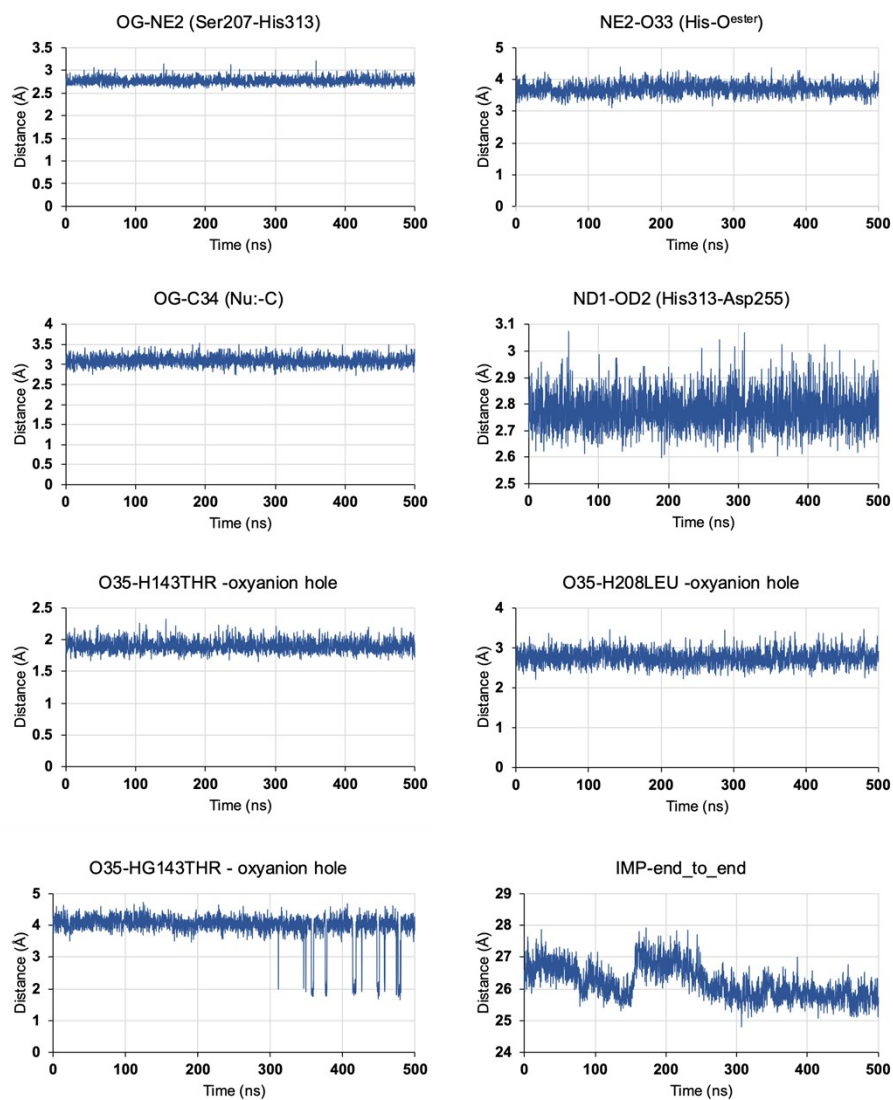

**Figure S5.** Time-dependent evolution of key distances along the 500 ns of free MD simulation of the non-covalent protein:ligand reactants complex with the extended conformation of impranil when the methyl carbamate end-group was exposed to the solvent, **RC1**.

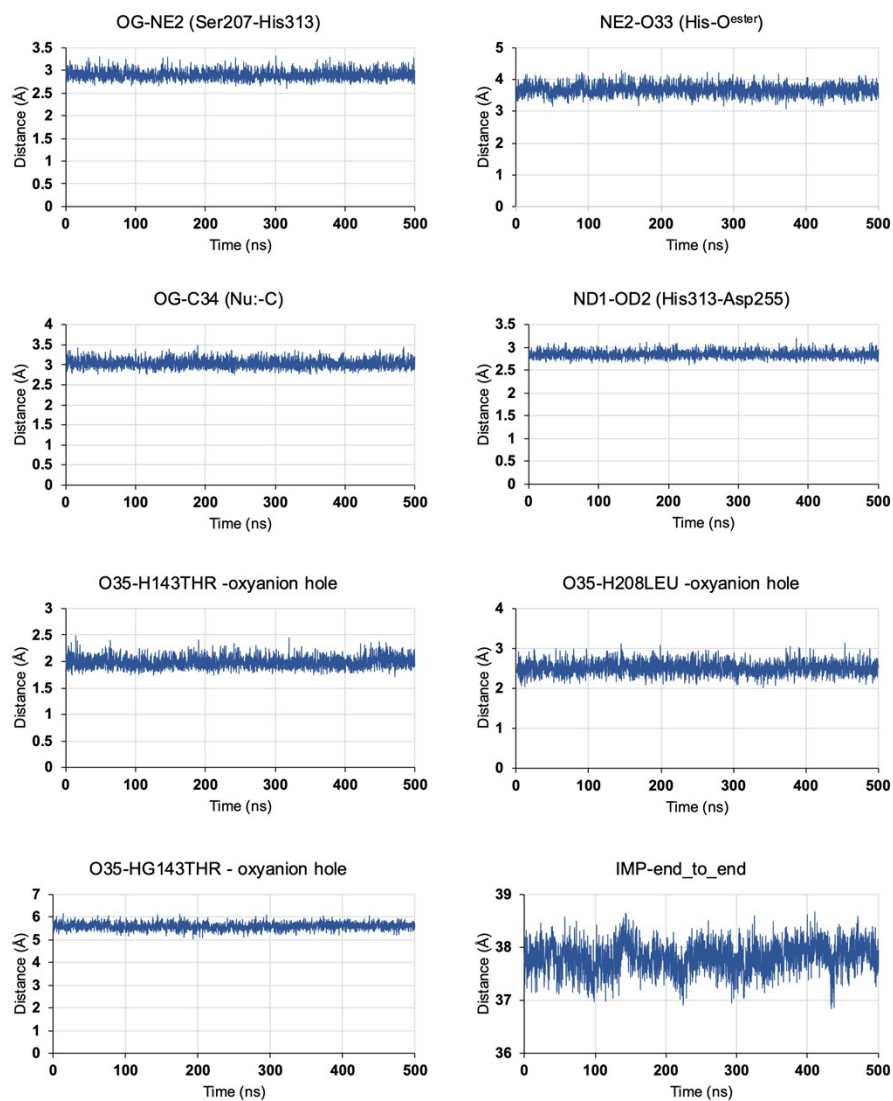

**Figure S6.** Time-dependent evolution of key distances along the 500 ns of free MD simulation of the non-covalent protein:ligand reactants complex with the extended conformation of impranil when the methyl carbamate end-group was exposed to the solvent, **RC2**.

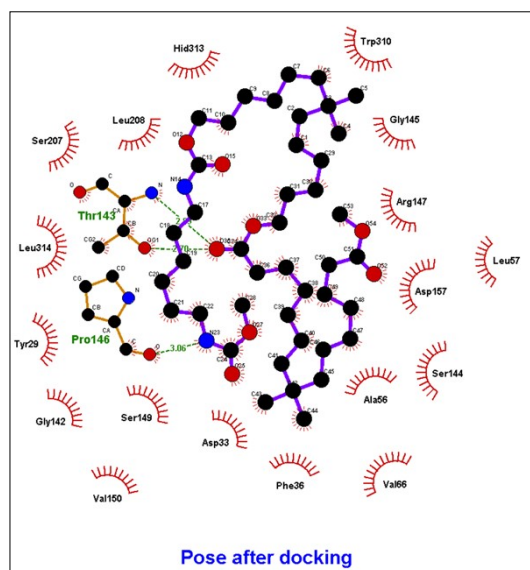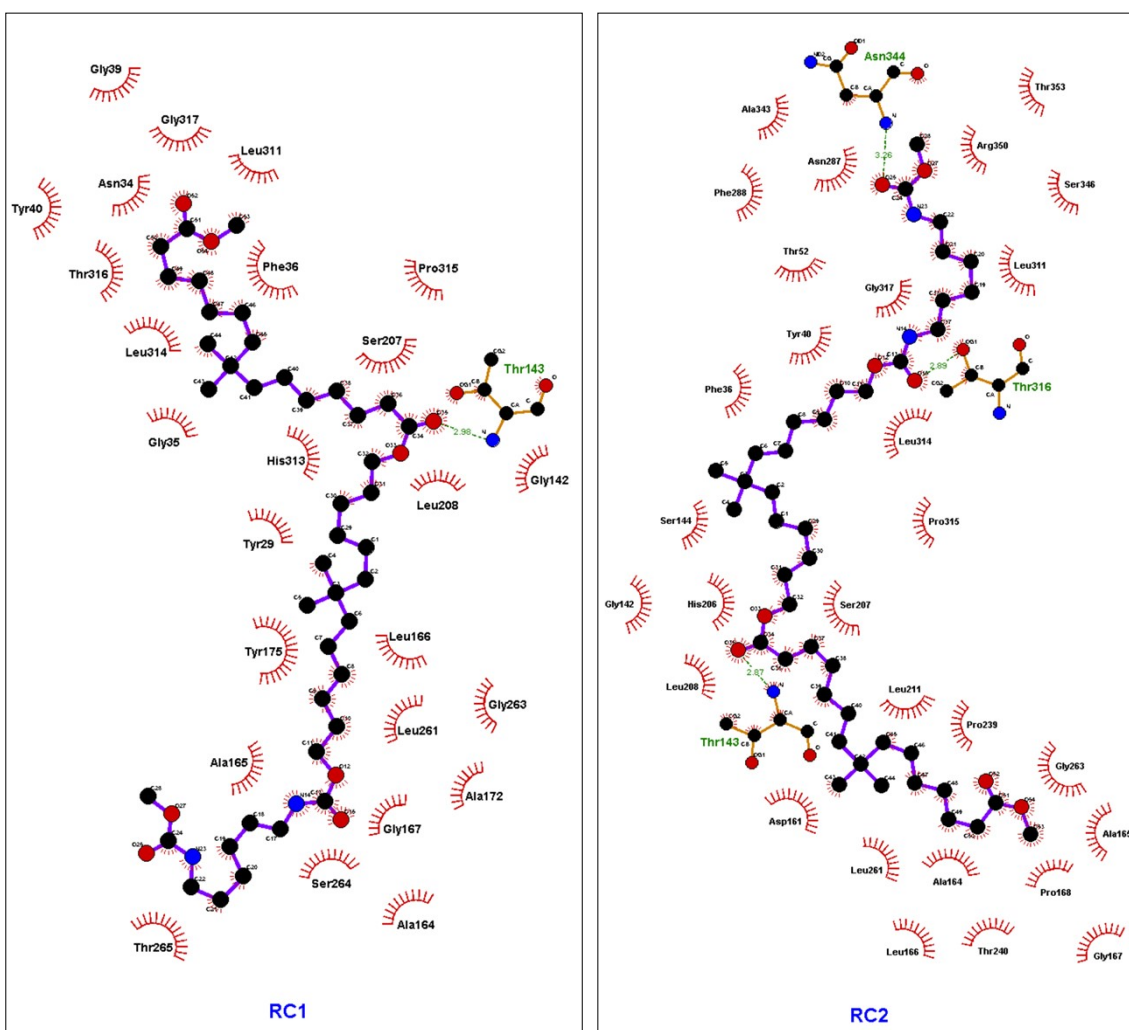

**Figure S7.** Diagram of hydrogen bonding interaction and hydrophobic contacts obtained for impranil pose generated after docking and in its RC1 and RC2 configurations. Schemes were generated using Ligplot+ ver. 2.2.8 program.

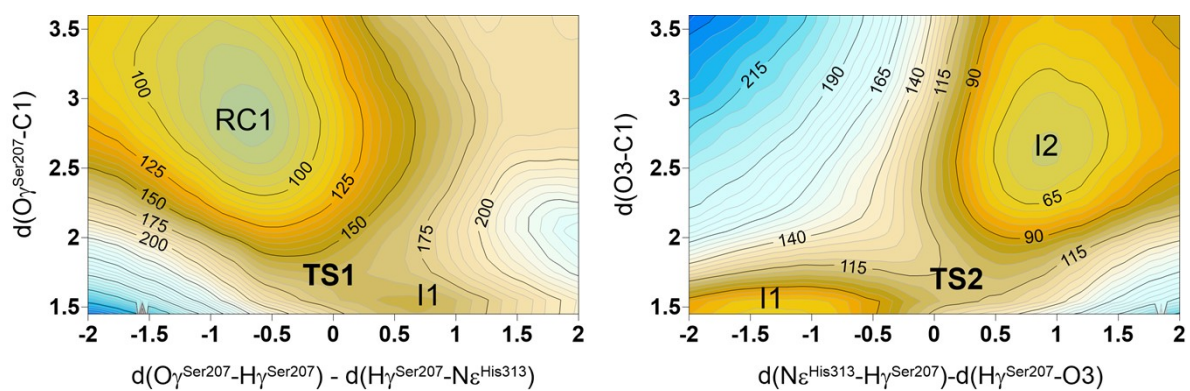

**Figure S8.** M06-2X:AM1/AMBER Free Energy Surfaces of acylation step starting from the RC1. Distances are given in Å and isoenergetic lines are in kcal·mol<sup>-1</sup>.
